# Supplementary material
Source: publisher figshare collection journal article supplement (https://acs.figshare.com/ndownloader/files/6488571)
Supplement: Supplementary file 1 [file 6488571]

# Supporting information

## Multi-Shape and Temperature Memory Effects via Strong Physical Confinement in Poly(Propylene Carbonate)/Graphene Oxide Nanocomposites

Xiaodong Qi, Yilan Guo, Yuan Wei, Peng Dong, Qiang Fu\*

College of Polymer Science and Engineering, State Key Laboratory of Polymer Materials Engineering, Sichuan University, Chengdu 610065, China.

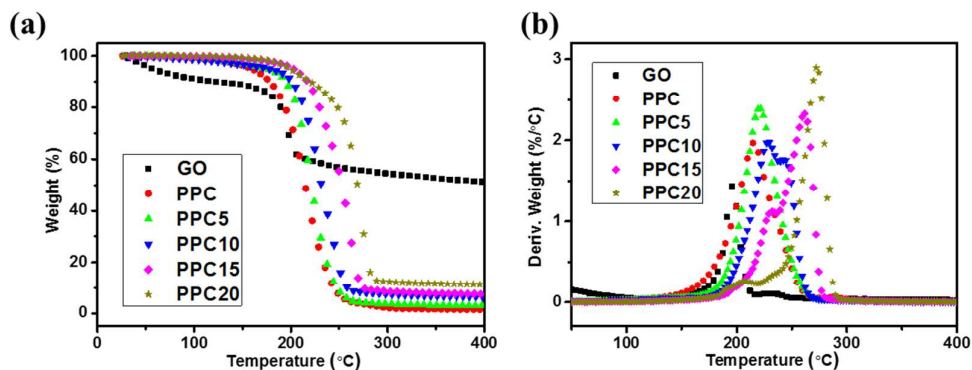

**Figure S1.** TGA and corresponding DTG curves of pure PPC and PPC/GO nanocomposites. The test was conducted by using a thermo-analyzer instrument (TA Q500, USA) under an air flow ( $60 \text{ ml min}^{-1}$ ). The heating rate was  $10 \text{ }^\circ\text{C min}^{-1}$ .

\* Corresponding author: Tel: +86 28 8546 1795, Email: qiangfu@scu.edu.cn (Q. Fu)

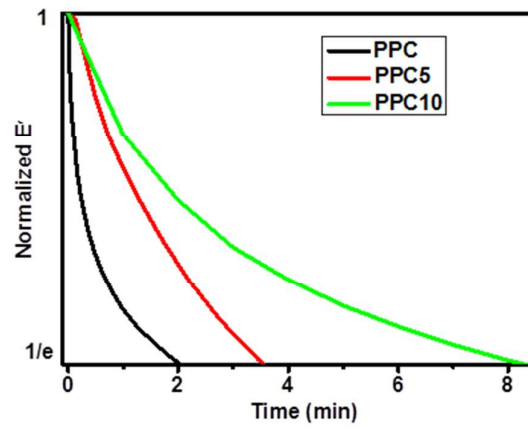

**Figure S2.** Stress relaxation of PPC, PPC5 and PPC10 as a function of time. The stress relaxation experiments were tested at 60 °C with a constant strain of 50 %.
